# Supplementary material for: The Role of the Global Solar UV Index for Sun Protection of Children in German Kindergartens
Source: MDPI journal article supplement (doi:10.3390/children9020198), 2022-02-03
Supplement: s1 [file s1]

## Supplemental Information

**Table S1.** Exposures perceived as risk factor of skin cancer among directors of kindergartens (N = 436). Exposures are grouped in true risk factors of skin cancer (upper part) and distracting factors (lower part). Absolute (n) and relative (%) frequencies of affirmative answers to the question whether the corresponding exposure acts as risk factor of skin cancer. Relative frequencies are accompanied by 95%-confidence intervals (95%-CI) calculated using Wilson's method.

| Exposure                                                                     | n   | % <sup>1</sup> | 95%-CI      |
|------------------------------------------------------------------------------|-----|----------------|-------------|
| <i>Risk factors:</i>                                                         |     |                |             |
| Sunburns in childhood                                                        | 252 | 57.8           | 53.1 – 62.4 |
| Intermittent intensive sun exposure<br>(e.g. during holidays in sunny areas) | 251 | 57.6           | 52.9 – 62.1 |
| Fair skin, fair hair                                                         | 244 | 56.0           | 51.3 – 60.6 |
| Chronic intensive sun exposure<br>(e.g. during outdoor work)                 | 241 | 55.3           | 50.6 – 59.9 |
| Number of sunbaths during life                                               | 237 | 54.4           | 49.7 – 59.0 |
| Number of nevi                                                               | 235 | 53.9           | 49.2 – 58.5 |
| <i>Distracting factors:</i>                                                  |     |                |             |
| Rising air pollution                                                         | 74  | 17.0           | 13.7 – 20.8 |
| Nutrition                                                                    | 70  | 16.1           | 12.9 – 19.8 |
| Allergies                                                                    | 58  | 13.3           | 10.4 – 16.8 |

<sup>1</sup> Denominator for all values was 436
